# Supplementary material for: Immunoglobulin signature predicts risk of post-acute COVID-19 syndrome
Source: PubMed Central journal article supplement (PMC8789854; doi:10.1038/s41467-021-27797-1), 2022-01-25
Supplement: 41467_2021_27797_MOESM1_ESM.pdf [file 41467_2021_27797_MOESM1_ESM.pdf]

1 **Supplementary material:**

2 **Immunoglobulin signature predicts**  
3 **risk of post-acute COVID-19 syndrome**

4  
5 **Authors:** Carlo Cervia<sup>1</sup>, Yves Zurbuchen<sup>1</sup>, Patrick Taeschler<sup>1</sup>, Tala Ballouz<sup>2</sup>, Dominik  
6 Menges<sup>2</sup>, Sara Hasler<sup>1</sup>, Sarah Adamo<sup>1</sup>, Miro E. Raeber<sup>1</sup>, Esther Bächli<sup>3</sup>, Alain Rudiger<sup>4</sup>,  
7 Melina Stüssi-Helbling<sup>5</sup>, Lars C. Huber<sup>5</sup>, Jakob Nilsson<sup>1</sup>, Ulrike Held<sup>2</sup>, Milo A. Puhan<sup>2</sup>,  
8 and Onur Boyman<sup>1,6\*</sup>

9  
10 **Affiliations:**

11 <sup>1</sup> Department of Immunology, University Hospital Zurich, University of Zurich; Zurich,  
12 Switzerland.

13 <sup>2</sup> Epidemiology, Biostatistics and Prevention Institute, University of Zurich; Zurich,  
14 Switzerland.

15 <sup>3</sup> Clinic for Internal Medicine, Uster Hospital; Uster, Switzerland.

16 <sup>4</sup> Department of Medicine, Limmattal Hospital; Schlieren, Switzerland.

17 <sup>5</sup> Clinic for Internal Medicine, City Hospital Triemli Zurich; Zurich, Switzerland.

18 <sup>6</sup> Faculty of Medicine, University of Zurich; Zurich, Switzerland.

19 \* Corresponding author. Email: onur.boyman@uzh.ch.

20  
21  
22

**Supplementary Table 1. History of respiratory disease and SARS-CoV-2 infection during follow-up in study participants (n = 174).**

| Disease severity                                                                                                                                                                                                                                       | Control group<br>(n = 40) | Mild COVID-19<br>(n = 89) | Severe COVID-19<br>(n = 45) |
|--------------------------------------------------------------------------------------------------------------------------------------------------------------------------------------------------------------------------------------------------------|---------------------------|---------------------------|-----------------------------|
| Respiratory symptoms – no. (%)                                                                                                                                                                                                                         | 13 (32.5)                 | 26 (29.2)                 | 7 (15.6)                    |
| SARS-CoV-2 exposure <sup>a</sup> – no. (%)                                                                                                                                                                                                             | 8 (20.0)                  | 14 (15.7)                 | 4 (8.9)                     |
| Respiratory symptoms upon SARS-CoV-2 exposure – no. (%)                                                                                                                                                                                                | 2 (5.0)                   | 0 (0)                     | 0 (0)                       |
| Positive SARS-CoV-2-specific RT-qPCR test – no. (%)                                                                                                                                                                                                    | 5 (12.5)                  | 0 (0)                     | 0 (0)                       |
| Negative SARS-CoV-2-specific test <sup>b</sup> – no. (%)                                                                                                                                                                                               | 13 (32.5)                 | 31 (34.8)                 | 13 (28.9)                   |
| <sup>a</sup> Exposure to SARS-CoV-2-positive individual without adequate safety measures<br><sup>b</sup> SARS-CoV-2-specific RT-qPCR or antigen rapid testing<br>Abbreviations: RT-qPCR, reverse-transcriptase quantitative polymerase chain reaction. |                           |                           |                             |

23 **Supplementary Table 2. Logistic regression models for prediction of PACS.**

24 Different logistic regression models were applied on all patients of the derivation ( $n = 134$ )  
25 and validation cohort ( $n = 389$ ), outpatients of the derivation ( $n = 80$ ) and validation cohort  
26 ( $n = 372$ ), and hospitalized patients of the derivation ( $n = 54$ ) and validation cohort ( $n =$   
27  $17$ ). Area under the curve (AUC) values and 95% confidence intervals (CI) of the receiver  
28 operating characteristic curve are listed for the prediction of PACS. The color scheme  
29 reflects the performance of different scores and shows the lowest (light green) and  
30 highest (dark green) AUC in each subgroup analysis of the patient cohorts (columns).

31

| Predictor variables                                                  | Derivation cohort        |                          |                          | Validation cohort        |                          |                           |
|----------------------------------------------------------------------|--------------------------|--------------------------|--------------------------|--------------------------|--------------------------|---------------------------|
|                                                                      | All                      | Out-patients             | Hospitalized             | All                      | Out-patients             | Hospitalized              |
| Prediction model - AUC (CI)                                          |                          |                          |                          |                          |                          |                           |
| Age + Sex + No. of symptoms <sup>a,14</sup>                          | 683<br>(586-780)         | 614<br>(488-739)         | 569<br>(341-798)         | 587<br>(530-644)         | 582<br>(523-640)         | 712<br>(446-979)          |
| Age                                                                  | 643<br>(543-745)         | 568<br>(439-697)         | 460<br>(219-700)         | 513<br>(454-571)         | 511<br>(451-570)         | 591<br>(270-912)          |
| Age + Sex                                                            | 648<br>(547-748)         | 561 (433-689)            | 544<br>(304-785)         | 535<br>(477-593)         | 533<br>(474-592)         | 530<br>(221-839)          |
| Age + No. of symptoms                                                | 705<br>(610-799)         | 690<br>(573-806)         | 595<br>(385-804)         | 629<br>(574-685)         | 621<br>(564-679)         | 848<br>(580-1000)         |
| Age + No. of symptoms + Lung disease <sup>b</sup>                    | 748<br>(660-835)         | 740<br>(633-846)         | 632<br>(428-836)         | 635<br>(579-690)         | 627<br>(570-684)         | 848<br>(580-1000)         |
| Age + No. of symptoms + Asthma bronchiale <sup>c</sup>               | 754<br>(668-839)         | 735<br>(627-842)         | 648<br>(445-851)         | 643<br>(589-698)         | 636<br>(580-692)         | 833<br>(564-1000)         |
| Age + Disease severity (at sampling timepoint) <sup>d</sup>          | 656<br>(559-754)         | 568<br>(439-697)         | 568<br>(358-779)         |                          |                          |                           |
| Age + Disease severity (followed-up)                                 | 668<br>(572-764)         | 574<br>(446-702)         | 602<br>(385-820)         | 521<br>(463-580)         | 511<br>(451-570)         | 583<br>(269-897)          |
| Age + Disease severity (followed-up) + Asthma bronchiale             | 727<br>(640-815)         | 655<br>(535-774)         | 671<br>(476-865)         | 553<br>(495-610)         | 544<br>(485-603)         | 583<br>(269-897)          |
| Age + Disease grades <sup>e</sup> (followed-up) + Asthma bronchiale  | 749<br>(666-832)         | 675<br>(558-792)         | 753<br>(586-921)         |                          |                          |                           |
| Age + No. of symptoms + Asthma bronchiale + Body-Mass-Index          | 739<br>(644-834)         | 738<br>(622-855)         | 647<br>(444-850)         | 643<br>(589-698)         | 631<br>(574-688)         | 833<br>(564-1000)         |
| Age + No. of symptoms + Asthma bronchiale + IgM <sup>f</sup>         | 751<br>(666-837)         | 726<br>(617-835)         | 647<br>(450-845)         | 639<br>(584-694)         | 631<br>(574-687)         | 894<br>(725-1000)         |
| Age + No. of symptoms + Asthma bronchiale + IgA                      | 753<br>(668-838)         | 733<br>(624-842)         | 662<br>(469-856)         | 641<br>(587-696)         | 634<br>(578-691)         | 833<br>(598-1000)         |
| Age + No. of symptoms + Asthma bronchiale + IgG1                     | 754<br>(669-840)         | 734<br>(626-842)         | 649<br>(445-854)         | 643<br>(588-698)         | 636<br>(579-692)         | 833<br>(564-1000)         |
| Age + No. of symptoms + Asthma bronchiale + IgG2                     | 756<br>(670-842)         | 743<br>(636-850)         | 649<br>(442-856)         | 644<br>(589-699)         | 638<br>(581-694)         | 848<br>(606-1000)         |
| Age + No. of symptoms + Asthma bronchiale + IgG3                     | 756<br>(671-842)         | 745<br>(639-851)         | 647<br>(452-843)         | 642<br>(587-697)         | 635<br>(579-691)         | 879<br>(687-1000)         |
| Age + No. of symptoms + Asthma bronchiale + IgG4                     | 756<br>(670-842)         | 737<br>(629-845)         | 651<br>(445-857)         | 643<br>(588-698)         | 636<br>(580-692)         | 848<br>(580-1000)         |
| Age + No. of symptoms + Asthma bronchiale + IgM + IgG3               | 753<br>(668-839)         | 737<br>(629-846)         | 651<br>(461-841)         | 636<br>(581-691)         | 628<br>(572-685)         | 879<br>(705-1000)         |
| Age + No. of symptoms + Asthma bronchiale + IgM + IgG2 + IgG3        | 754<br>(668-839)         | 737<br>(629-846)         | 647<br>(456-838)         | 637<br>(582-692)         | 629<br>(573-686)         | 894<br>(726-1000)         |
| Age + No. of symptoms + Asthma bronchiale + IgM * IgG2               | 754<br>(669-839)         | 741<br>(634-849)         | 660<br>(465-856)         | 625<br>(570-681)         | 617<br>(560-674)         | 879<br>(713-1000)         |
| <b>Age + No. of symptoms + Asthma bronchiale + IgM * IgG3</b>        | <b>771<br/>(691-851)</b> | <b>723<br/>(613-834)</b> | <b>741<br/>(580-902)</b> | <b>636<br/>(581-691)</b> | <b>626<br/>(569-683)</b> | <b>985<br/>(943-1000)</b> |
| Age + Fatigue <sup>g</sup> + Asthma bronchiale + IgM * IgG2          | 745<br>(661-829)         | 673<br>(556-790)         | 735<br>(569-902)         | 603<br>(547-660)         | 593<br>(535-651)         | 764<br>(456-1000)         |
| Age + No. of symptoms + Level of care (at sampling timepoint)        | 754<br>(668-839)         | 735<br>(627-842)         | 648<br>(445-851)         | 643<br>(589-698)         | 636<br>(580-692)         | 833<br>(564-1000)         |
| Age + No. of symptoms + Level of care (at sampling timepoint) + IgM  | 751<br>(665-836)         | 725<br>(615-834)         | 645<br>(446-845)         | 639<br>(584-694)         | 630<br>(574-687)         | 894<br>(725-1000)         |
| Age + No. of symptoms + Level of care (at sampling timepoint) + IgG3 | 756<br>(670-841)         | 744<br>(638-851)         | 647<br>(452-843)         | 642<br>(587-696)         | 635<br>(578-691)         | 879<br>(687-1000)         |

<sup>a</sup> No. of symptoms during primary infection (0-5; fever, fatigue, cough, dyspnea, and gastrointestinal symptoms)  
<sup>b</sup> History of lung disease  
<sup>c</sup> History of asthma bronchiale  
<sup>d</sup> Disease severity (mild or severe COVID-19)  
<sup>e</sup> Disease grades (asymptomatic, mild illness, mild pneumonia, severe pneumonia, mild ARDS, moderate ARDS, severe ARDS)  
<sup>f</sup> Total Ig titers [g/l]  
<sup>g</sup> Presence of fatigue during primary infection (yes or no)  
PACS score is shown in bold.

32

33

34 **Supplementary Table 3. Variables of the PACS score.** Estimated coefficients and their  
 35 95% confidence intervals, p values, and coefficients after shrinkage are listed for the  
 36 prediction of PACS (logistic regression model), including an interaction term between total  
 37 IgM and IgG3 titers (IgM \* IgG3). The global shrinkage factor was 0.72.

38

| <b>Variables</b>                                                 | <b>Coefficients =<br/>log odds ratios</b> | <b>95% confidence<br/>interval</b> | <b>p value</b> | <b>Coefficients<br/>after shrinkage</b> |
|------------------------------------------------------------------|-------------------------------------------|------------------------------------|----------------|-----------------------------------------|
| Intercept                                                        | -1.532                                    | -3.74 to 0.36                      | 0.139          | -0.981                                  |
| Patient age [years]                                              | 0.364                                     | -0.04 to 0.79                      | 0.085          | 0.262                                   |
| No. of symptoms<br>during primary SARS-<br>CoV-2 infection [0-5] | 0.460                                     | 0.11 to 0.84                       | 0.014          | 0.331                                   |
| History of asthma<br>bronchiale [no/yes]                         | 2.634                                     | 0.83 to 5.64                       | 0.019          | 1.897                                   |
| Total IgM (g/l)                                                  | 1.171                                     | -0.16 to 2.82                      | 0.121          | 0.843                                   |
| Total IgG3 (g/l)                                                 | 1.905                                     | -0.19 to 4.58                      | 0.116          | 1.372                                   |
| IgM * IgG3                                                       | -2.128                                    | -4.45 to -0.29                     | 0.044          | -1.532                                  |

39 **Supplementary Table 4. Model behavior at different probability thresholds.** Two  
 40 thresholds were selected for further examination. 0.523 was selected as optimal cut-off  
 41 maximizing both sensitivity and specificity in the validation cohort. 0.746 was calculated  
 42 as optimal cut-off maximizing both sensitivity and specificity in hospitalized patients of the  
 43 derivation cohort ( $n = 134$ , with 85 having PACS) and hospitalized patients of the  
 44 validation cohort ( $n = 389$ , with 212 having PACS).

| Cohort                                                                          | Sensitivity | Specificity | PPV   | NPV   |
|---------------------------------------------------------------------------------|-------------|-------------|-------|-------|
| <b>Rule-in cut-off for general population and outpatients (0.523)</b>           |             |             |       |       |
| Derivation cohort                                                               | 0.835       | 0.551       | 0.763 | 0.659 |
| - Outpatients                                                                   | 0.705       | 0.583       | 0.674 | 0.618 |
| Validation cohort                                                               | 0.797       | 0.395       | 0.612 | 0.619 |
| - Outpatients                                                                   | 0.786       | 0.409       | 0.610 | 0.619 |
| <b>Rule-in cut-off for general population and hospitalized patients (0.746)</b> |             |             |       |       |
| Derivation cohort                                                               | 0.518       | 0.878       | 0.878 | 0.512 |
| - Hospitalized patients                                                         | 0.634       | 0.769       | 0.897 | 0.400 |
| Validation cohort                                                               | 0.283       | 0.870       | 0.723 | 0.503 |
| - Hospitalized patients                                                         | 0.909       | 1.000       | 1.000 | 0.857 |

45

46  
47  
48

**Supplementary Table 5. Participant characteristics of entire derivation cohort, including followed-up and non-followed-up patients.**

| Demographics                                                                                                               | Whole cohort<br>(n = 175) | Followed-up patients<br>(n = 134) | Non-followed-up patients<br>(n = 41) |
|----------------------------------------------------------------------------------------------------------------------------|---------------------------|-----------------------------------|--------------------------------------|
| Severe COVID-19 cases – no. (%)                                                                                            | 65 (37.1)                 | 45 (33.6)                         | 20 (48.8)                            |
| Age – median (IQR) [yrs]                                                                                                   | 47 (31–67)                | 43 (30–64)                        | 66 (34–78)                           |
| Sex – male no. (%)                                                                                                         | 94 (53.7)                 | 75 (56.0)                         | 19 (46.3)                            |
| Level of care <sup>a</sup> – hospitalized no. (%)                                                                          | 81 (46.3)                 | 54 (40.3)                         | 27 (65.9)                            |
| No. of symptoms <sup>b</sup> (IQR)                                                                                         | 2 (1–3)                   | 2 (1–3)                           | 2 (2–3)                              |
| <b>Pre-existing comorbidities and treatments – no. (%)</b>                                                                 |                           |                                   |                                      |
| Cardiovascular disease                                                                                                     | 32 (18.3)                 | 18 (13.4)                         | 14 (34.1)                            |
| Diabetes mellitus                                                                                                          | 25 (14.3)                 | 19 (14.2)                         | 6 (14.6)                             |
| Hypertension                                                                                                               | 50 (28.6)                 | 31 (23.1)                         | 19 (46.3)                            |
| Kidney disease                                                                                                             | 25 (14.3)                 | 15 (11.2)                         | 10 (24.4)                            |
| Lung disease                                                                                                               | 26 (14.9)                 | 21 (15.7)                         | 5 (12.2)                             |
| Asthma bronchiale                                                                                                          | 17 (9.7)                  | 17 (12.7)                         | 0                                    |
| Malignancy                                                                                                                 | 12 (6.9)                  | 8 (6.0)                           | 4 (9.8)                              |
| Systemic immunosuppression                                                                                                 | 10 (5.7)                  | 9 (6.7)                           | 1 (2.4)                              |
| <b>Laboratory characteristics at primary infection</b>                                                                     |                           |                                   |                                      |
| Time after symptom onset [days]                                                                                            | 11 (7–16)                 | 11 (7–17)                         | 13 (7–15)                            |
| CRP [mg/L]                                                                                                                 | 7.2 (0.9–55.5)            | 4.4 (0.7–45.0)                    | 25.3 (1.6–78.3)                      |
| IL-6 [pg/mL]                                                                                                               | 3.9 (0.8–18.6)            | 3.6 (0.4–16.3)                    | 6.9 (1.6–30.7)                       |
| TNF [pg/mL]                                                                                                                | 11.1 (8.6–16.2)           | 11.0 (8.6–15.5)                   | 14.5 (8.3–19.1)                      |
| Leukocytes [10 <sup>9</sup> /L]                                                                                            | 5.6 (4.5–7.0)             | 5.9 (4.6–7.1)                     | 5.2 (3.8–6.3)                        |
| Neutrophils [10 <sup>9</sup> /L]                                                                                           | 3.4 (2.4–4.5)             | 3.4 (2.6–4.5)                     | 2.7 (2.2–4.4)                        |
| Lymphocytes [10 <sup>9</sup> /L]                                                                                           | 1.4 (0.9–2.0)             | 1.6 (1.0–2.1)                     | 1.0 (0.7–1.6)                        |
| NLR                                                                                                                        | 2.0 (1.4–3.8)             | 2.0 (1.4–3.8)                     | 2.2 (1.2–3.9)                        |
| SARS-CoV-2 IgA [OD ratio]                                                                                                  | 3.2 (0.8–7.4)             | 3.0 (0.8–7.3)                     | 3.7 (0.8–7.9)                        |
| SARS-CoV-2 IgG [OD ratio]                                                                                                  | 1.1 (0.3–5.1)             | 1.0 (0.3–4.6)                     | 1.2 (0.3–6.6)                        |
| Total IgM [g/l]                                                                                                            | 1.0 (0.7–1.4)             | 1.0 (0.7–1.4)                     | 1.1 (0.7–1.3)                        |
| Total IgA [g/l]                                                                                                            | 2.3 (1.7–3.0)             | 2.3 (1.7–3.0)                     | 2.4 (1.6–2.9)                        |
| Total IgG [g/l]                                                                                                            | 11.0 (9.3–12.9)           | 11.2 (9.4–13.0)                   | 10.7 (7.9–12.0)                      |
| Total IgG1 [g/l]                                                                                                           | 5.7 (4.4–6.9)             | 5.9 (4.4–6.9)                     | 5.5 (4.4–6.9)                        |
| Total IgG2 [g/l]                                                                                                           | 3.7 (2.6–4.6)             | 3.7 (2.9–4.7)                     | 3.2 (2.2–4.6)                        |
| Total IgG3 [g/l]                                                                                                           | 0.7 (0.5–1.0)             | 0.7 (0.5–1.1)                     | 0.7 (0.5–1.0)                        |
| Total IgG4 [g/l]                                                                                                           | 0.3 (0.2–0.5)             | 0.3 (0.2–0.5)                     | 0.3 (0.2–0.4)                        |
| No information on BMI of non-followed-up patients available.                                                               |                           |                                   |                                      |
| <sup>a</sup> Level of care at sampling timepoint                                                                           |                           |                                   |                                      |
| <sup>b</sup> No. of symptoms during primary infection (0-5; fever, fatigue, cough, dyspnea, and gastrointestinal symptoms) |                           |                                   |                                      |

49

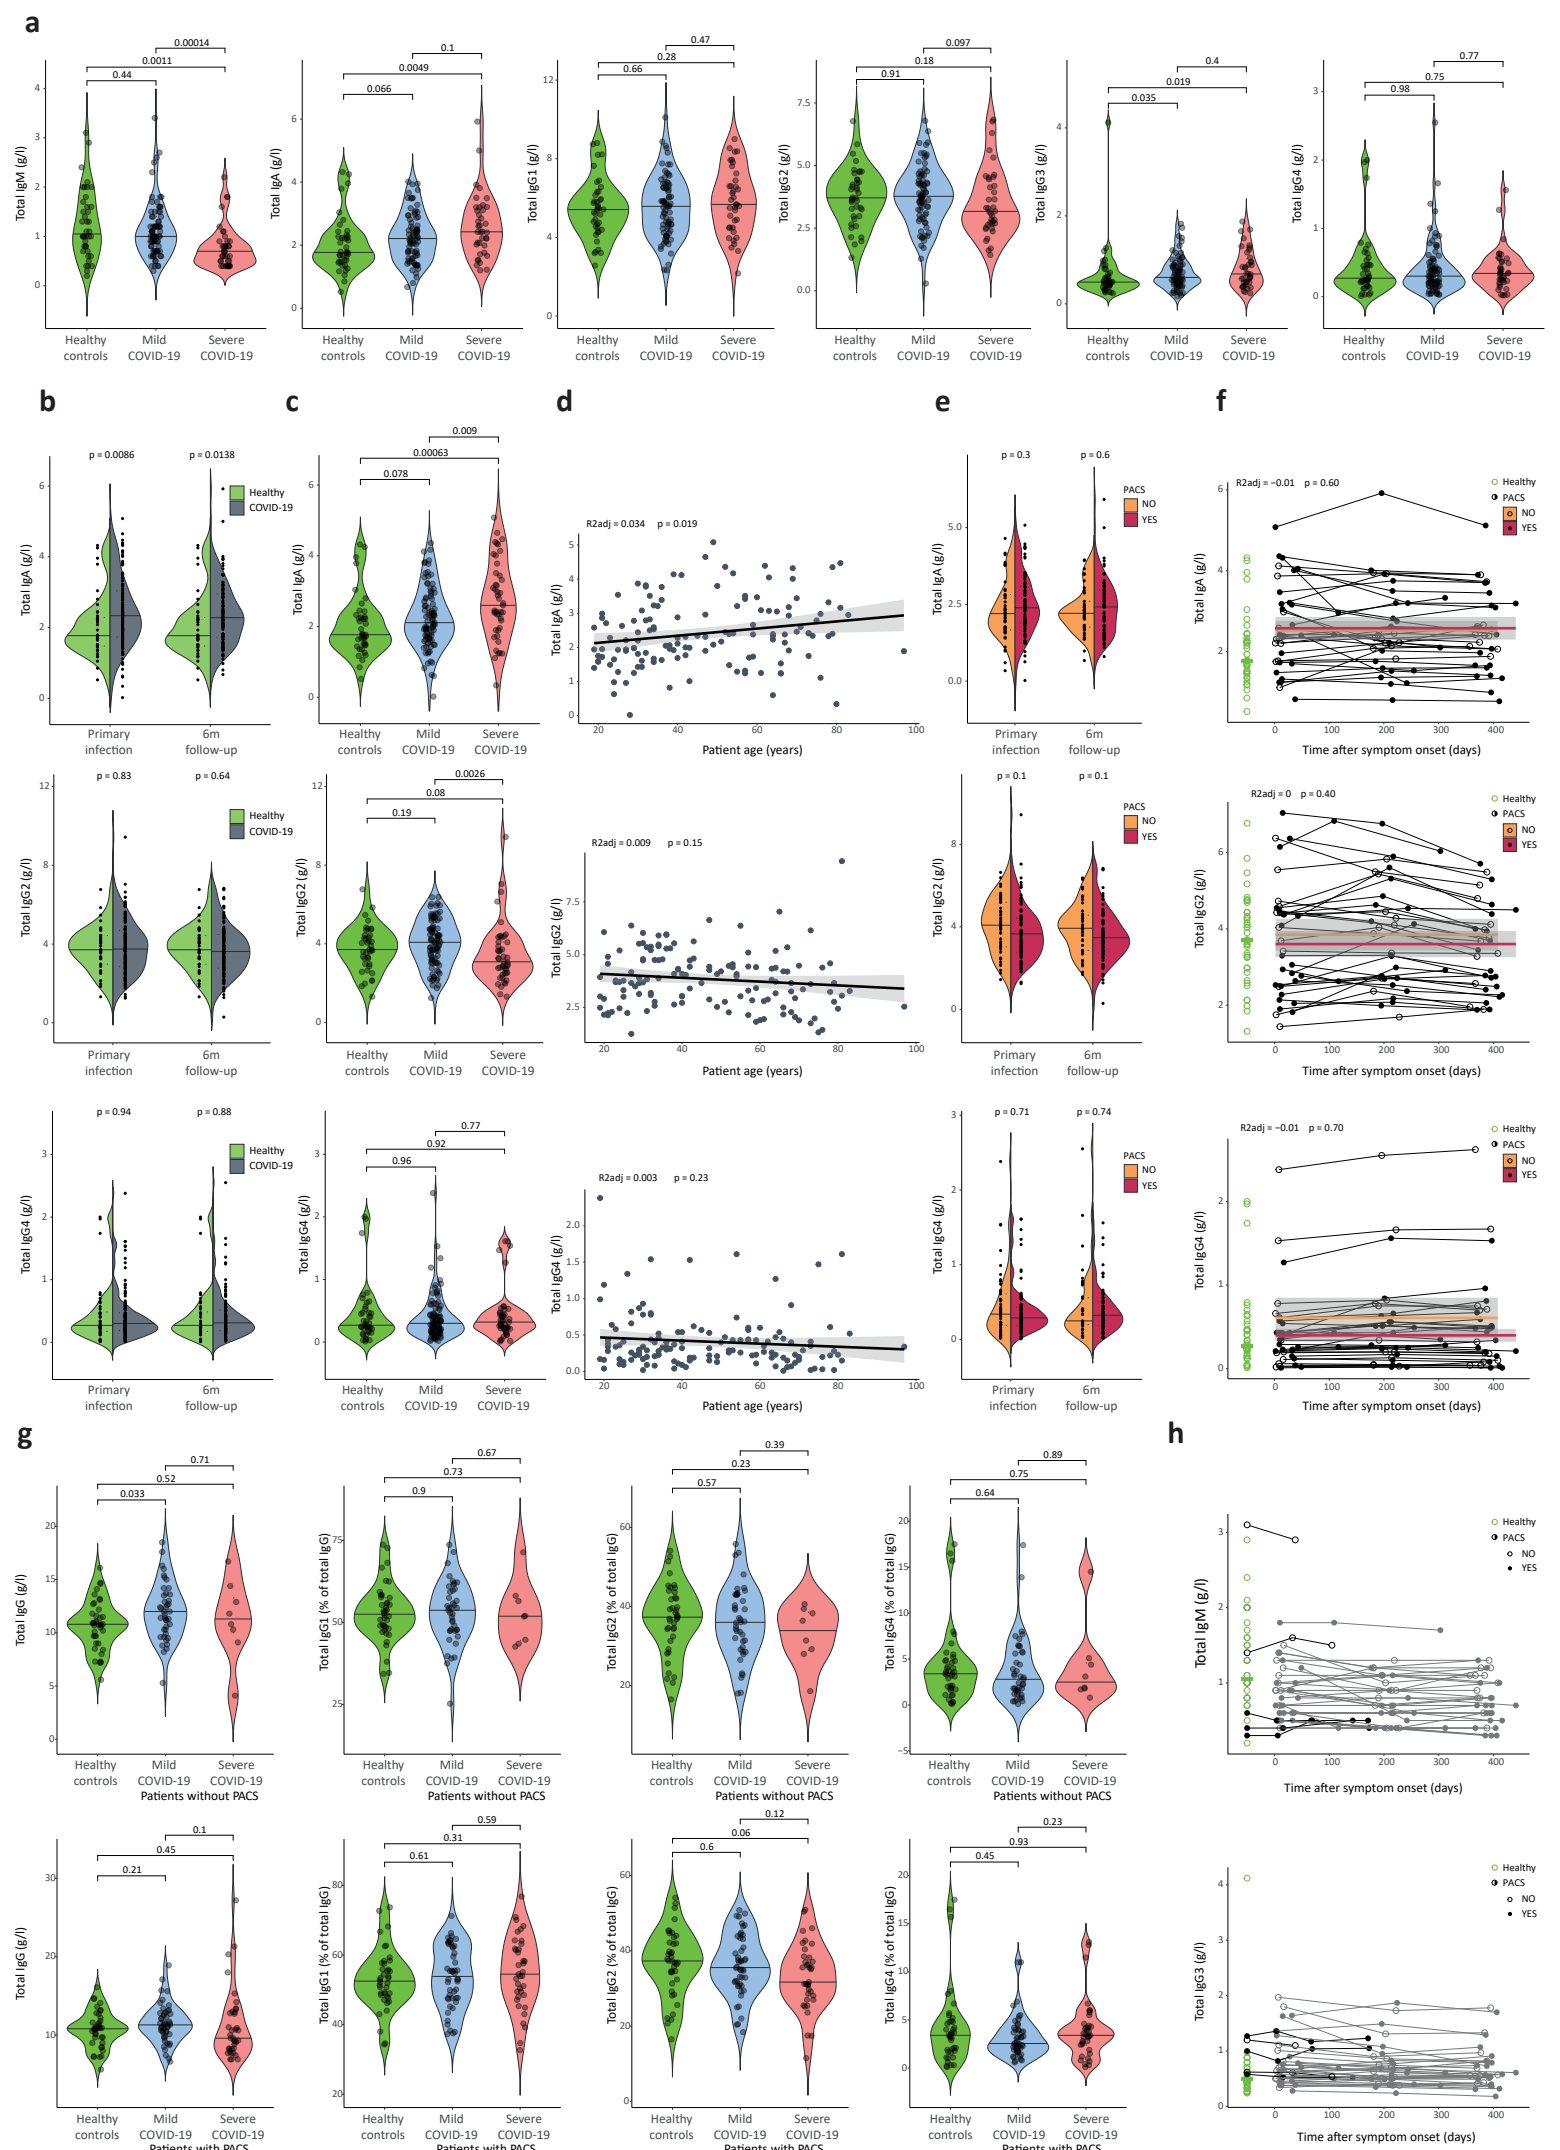

Supplementary Figure 1



50 **Supplementary Fig. 1. Immunoglobulin signatures in COVID-19 patients.** **a**, Total  
51 serum concentrations of IgM, IgA, and IgG subclasses IgG1 to IgG4 in healthy controls  
52 ( $n = 40$ ) versus COVID-19 patients with mild ( $n = 77$ ) or severe disease ( $n = 38$ ) at 6-  
53 month (6m) follow-up. **b-c**, Total serum concentrations of IgA, IgG2, and IgG4 in healthy  
54 controls versus (b) all ( $n = 134$ ) or (c) mild ( $n = 89$ ) and severe ( $n = 45$ ) COVID-19 cases  
55 during primary infection. **d**, Ig titers at primary infection as a function of age in COVID-19  
56 patients, with adjusted R2 ( $R2_{adj}$ ) and p values of linear model (shown with 95%  
57 confidence interval [CI]). **e**, Ig signatures in patients without or with PACS, during primary  
58 infection ( $n = 49$  and  $85$ , respectively) and 6-month follow-up ( $n = 41$  and  $74$ , respectively).  
59 **f**, Ig titers in patients attending all follow-up visits ( $n = 34$ ) as a function of days after  
60 symptom onset, with  $R2_{adj}$  and p values of generalized additive model (shown with 95%  
61 CI). Corresponding patients without (circles;  $n = 12$ ) and with PACS (dots;  $n = 22$ ) are  
62 connected, with a spline overlaid for both groups (orange and red, respectively). Green  
63 horizontal line indicates median in healthy controls (left). **g**, Total serum concentration of  
64 IgG, and percentages of IgG1, IgG2, and IgG4 of total IgG during primary infection in  
65 healthy controls, mild and severe COVID-19 patients without (top) or with PACS (bottom).  
66 **h**, IgM (top) and IgG3 (bottom) titers in patients attending all follow-up visits ( $n = 34$ ) as a  
67 function of days after symptom onset, with additional 5 patients that were initially included  
68 as healthy controls and later as COVID-19 patients upon SARS-CoV-2 infection.  
69 Individuals not developing and developing PACS are visualized as circles or dots  
70 respectively. Variables were compared using two-sided Wilcoxon's test.

71  
72

**a**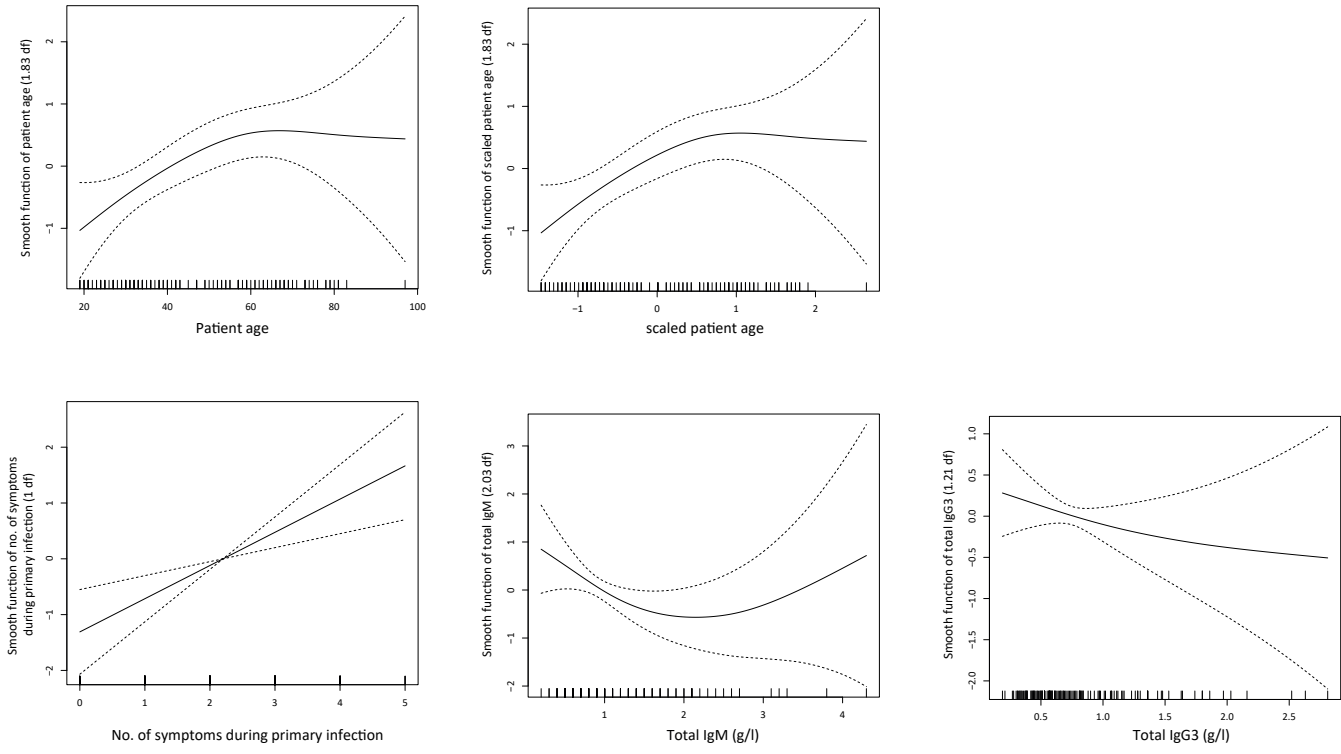**b**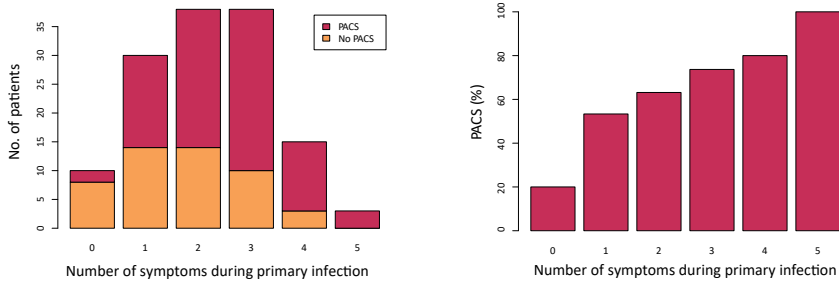**c**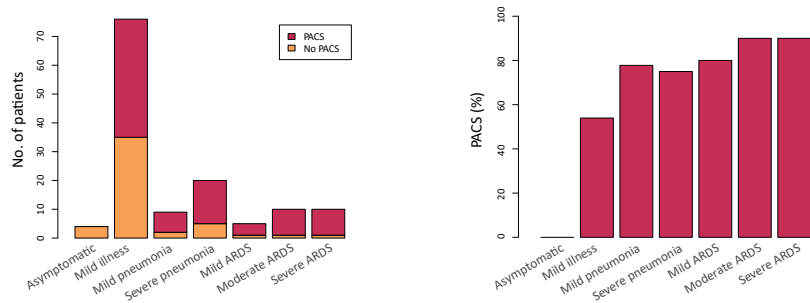

73 **Supplementary Fig. 2. Predictor variables of PACS.** **a**, Linearity of continuous  
74 variables included in PACS score: age, age translated into terms of a scale of age norms,  
75 number of symptoms during primary infection (0-5; fever, fatigue, cough, dyspnea, and  
76 gastrointestinal symptoms), total IgM (g/l), and total IgG3 (g/l) during primary infection.  
77 Variables were examined as univariate functions of the binomial outcome PACS using a  
78 generalized additive model ( $n = 134$ , with 85 having PACS). **b**, Proportion (left) and  
79 percentages (right) of patients with PACS in patients reporting zero to five symptoms  
80 during primary infection. **c**, Proportion (left) and percentages (right) of patients with PACS  
81 in patients with different followed-up disease grades.

82

**a**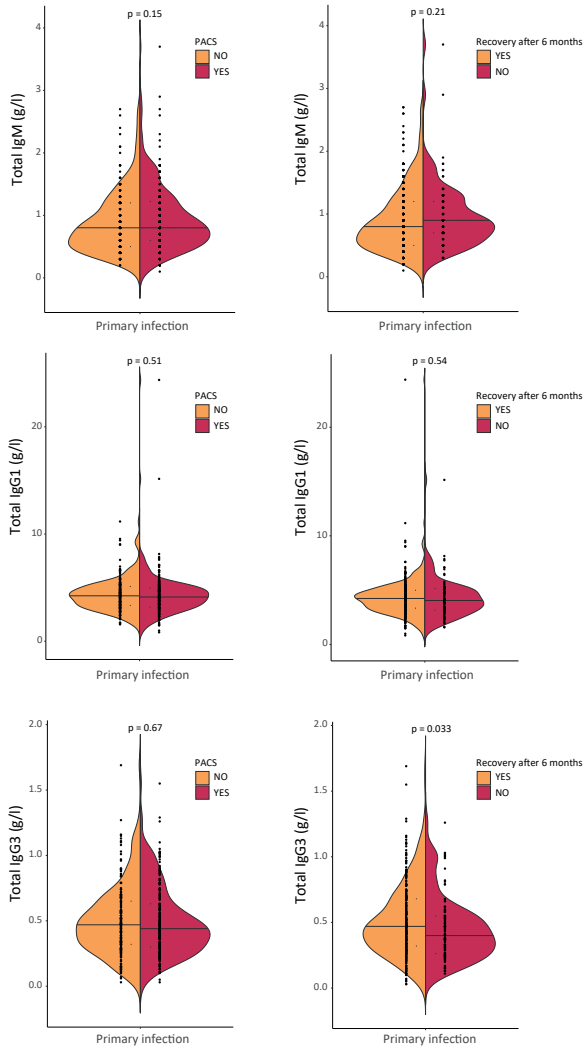**b**

Immunoglobulin signature of COVID-19 patients during primary infection

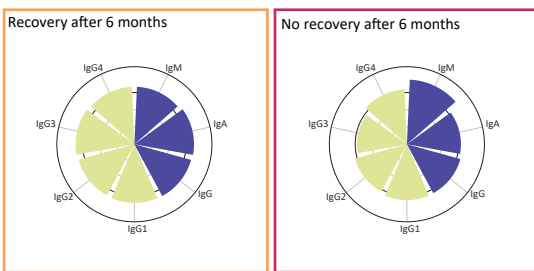

83 **Supplementary Fig. 3. Total immunoglobulin titers during primary infection in**  
84 **validation cohort. a**, Total IgM, IgG1 and IgG3 titers in patients without or with PACS, (*n*  
85 = 177 and 212, respectively) as well as patients that reported full recovery or no full  
86 recovery after six months (right; *n* = 299 and 90, respectively). Variables were compared  
87 using two-sided Wilcoxon's test. **b**, Radar plots with wedge sizes representing median Ig  
88 concentrations of patients without or with recovery after six months, normalized to median  
89 concentrations of all patients.

90

91

**a**

**PACS score:**

Outcome: PACS (symptoms > 4 weeks)  
Derivation cohort (primary infection)

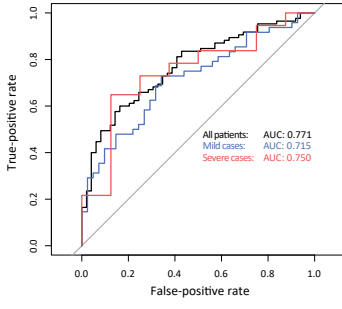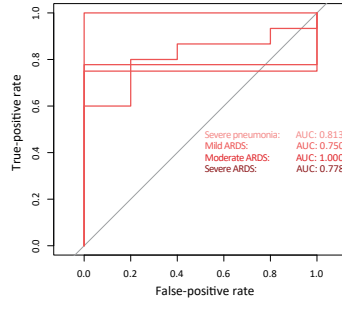

Outcome: PACS (symptoms > 4 weeks)  
Validation cohort (primary infection)

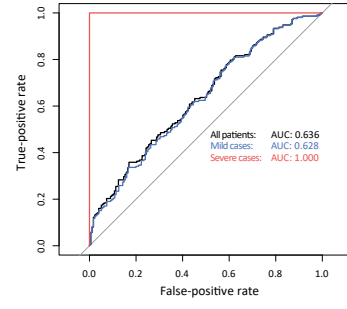

**b**

**PACS score:**

Outcome: Post-COVID-19 syndrome (symptoms > 12 weeks)  
Derivation cohort (primary infection)

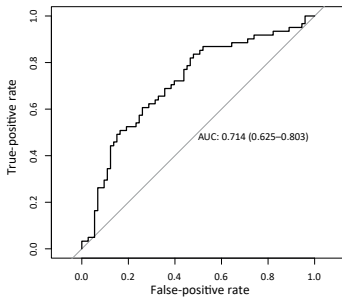

Outcome: No recovery after 6 months  
Validation cohort (primary infection)

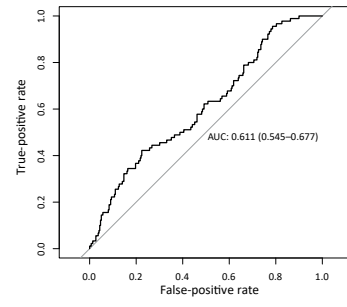

92 **Supplementary Fig. 4. PACS score subgroup and sensitivity analysis.** **a**, Receiver  
93 operating characteristic (ROC) curves reporting the area under the curve (AUC) with 95%  
94 confidence intervals (CI) of the PACS score after shrinkage applied to all (black;  $n = 134$   
95 with 85 having PACS), mild (blue;  $n = 89$  with 48 having PACS) and severe (red;  $n = 45$   
96 with 37 having PACS) COVID-19 patients of the derivation cohort during primary infection  
97 (left) as well as validation cohort (right;  $n = 389$ , 380 and 9 with 212, 205 and 7 having  
98 PACS respectively). ROC curves (middle) reporting the AUC of different disease grades  
99 within severe COVID-19 patients of the derivation cohort, namely severe pneumonia,  
100 mild, moderate and severe ARDS ( $n = 20$ , 5, 10 and 10 with 15, 4, 9 and 9 having PACS).  
101 Disease severity was followed-up and independent of sampling timepoint. **b**, Sensitivity  
102 analysis showing ROC curves, AUC and CI of the derivation cohort using post-COVID-  
103 19 syndrome as outcome, defined as symptoms enduring longer than 12 weeks after  
104 onset of first COVID-19-related symptoms (left;  $n = 134$ , with 61 showing post-COVID-19  
105 syndrome) as well as using recovery after six months as outcome in the validation cohort  
106 (right;  $n = 389$ , with 90 not having recovered after six months).

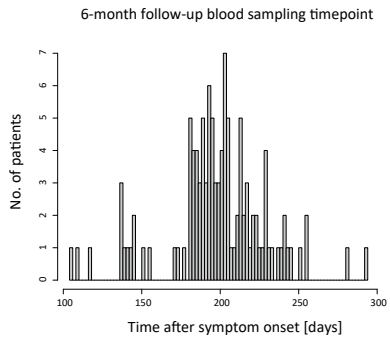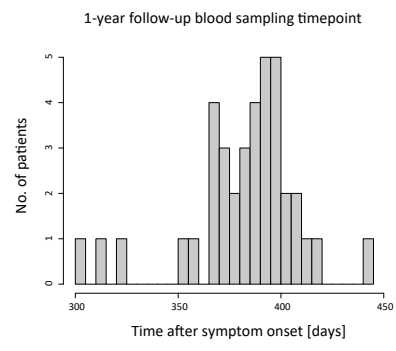



107 **Supplementary Fig. 5. Blood sampling timepoints of COVID-19 patient follow-up.**

108 Timepoints of blood sampling in COVID-19 patients of derivation cohort in relation to  
109 symptom onset. The second visit was planned around six months after symptom onset  
110 (left;  $n = 115$ ) with an average timepoint of 199 days (interquartile range 185–216) and  
111 the third visit around one year after symptom onset (right;  $n = 38$ ) with an average  
112 timepoint of 383 days (interquartile range 371–397).

113

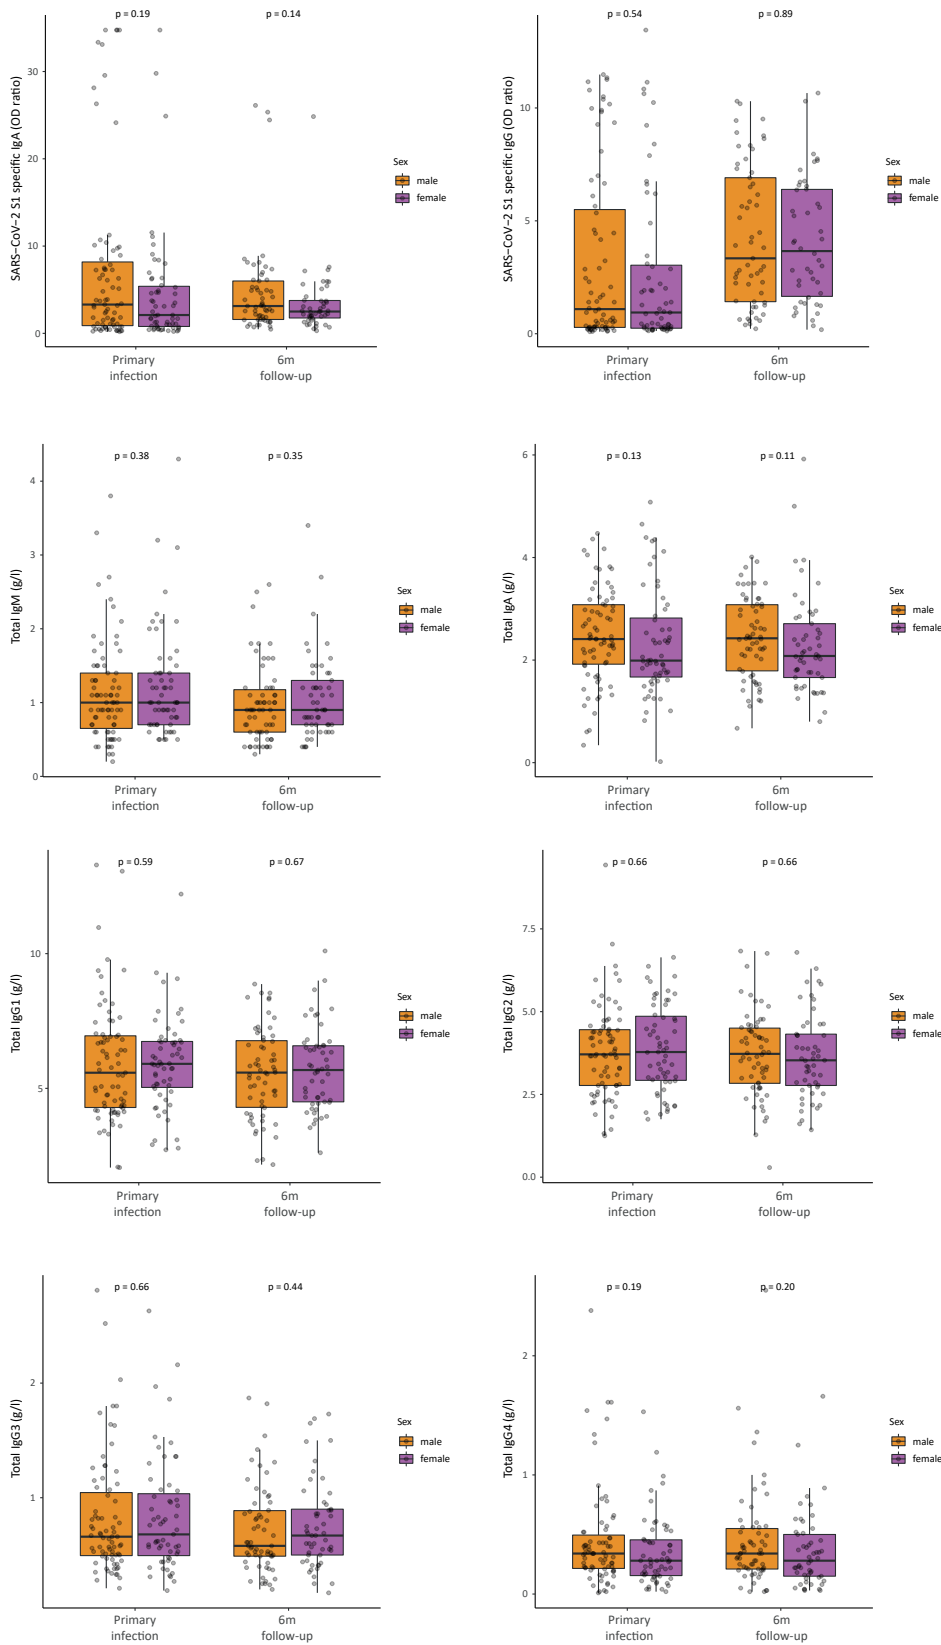

114 **Supplementary Fig. 6. Sex differences in COVID-19 patients experiencing PACS.**  
115 Comparison of SARS-CoV-2 S1-specific IgA and IgG titers and total immunoglobulin  
116 concentrations of IgM, IgA, and IgG subclasses IgG1 to IgG4 in male and female COVID-  
117 19 patients at primary SARS-CoV-2 infection ( $n = 75$  and  $59$ , respectively) and 6-month  
118 (6m) follow-up ( $n = 62$  and  $53$ , respectively). SARS-CoV-2 vaccinated individuals have  
119 been excluded from SARS-CoV-2 S1-specific IgA and IgG analysis at 6m follow-up  
120 (adjusted  $n = 57$  and  $46$ , respectively). Boxplots represent median (middle line) with upper  
121 and lower quartiles (box limits), and  $1.5 \times$  interquartile ranges (whiskers). Variables were  
122 compared using two-sided Wilcoxon's test.
