# Supplementary material for: Immunoglobulin signature predicts risk of post-acute COVID-19 syndrome
Source: PubMed Central journal article supplement (PMC8789854; doi:10.1038/s41467-021-27797-1), 2022-01-25
Supplement: 41467_2021_27797_MOESM2_ESM.pdf [file 41467_2021_27797_MOESM2_ESM.pdf]

### **Description of Additional Supplementary Files**

File Name: Supplementary Software 1

Description: R code for immunoglobulin signature analysis and prediction model development
